# Supplementary material for: Synthetic ozone deposition and stomatal uptake at flux tower sites
Source: Copernicus journal article supplement (doi:10.5194/bg-15-5395-2018), 2018-09-06
Supplement: Supplementary file 1 [file bg-15-5395-2018-supplement.pdf]

Supplement of Biogeosciences, 15, 5395–5413, 2018  
<https://doi.org/10.5194/bg-15-5395-2018-supplement>  
© Author(s) 2018. This work is distributed under  
the Creative Commons Attribution 4.0 License.

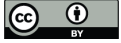

*Supplement of*

## **Synthetic ozone deposition and stomatal uptake at flux tower sites**

**Jason A. Ducker et al.**

*Correspondence to:* Jason A. Ducker ([jad10d@my.fsu.edu](mailto:jad10d@my.fsu.edu))

The copyright of individual parts of the supplement might differ from the CC BY 4.0 License.

## 1 S1 Calculation of stomatal conductance and deposition velocity

2  
3 Several methods for calculating stomatal conductance and O<sub>3</sub> deposition velocity from eddy  
4 covariance measurements are found in literature (e.g. Wesely and Hicks, 1977; Gerosa et al.,  
5 2005; Fares et al., 2010). While we follow the same general approach, we present the methods  
6 here for completeness and to point out some particular choices we have made. These expressions  
7 are used in Eqs. 1-3. The required input variables are O<sub>3</sub> mole fraction (mol mol<sup>-1</sup>), temperature  
8 (K), pressure (Pa), specific humidity (kg kg<sup>-1</sup>), friction velocity (m s<sup>-1</sup>), sensible and latent heat  
9 fluxes (W m<sup>-2</sup>), canopy height (m), and leaf area index (m<sup>2</sup> m<sup>-2</sup>).

10  
11 The aerodynamic and quasi-laminar layer resistances are calculated from measurements of  
12 momentum flux using the Monin-Obukhov similarity relations. For heat, O<sub>3</sub>, and other gases, the  
13 aerodynamic resistance ( $r_a$ , s m<sup>-1</sup>) is (Foken, 2017, pp. 219-223)

$$14 \quad r_a = \frac{1}{ku_*} \left[ \ln \left( \frac{z-d}{z_0} \right) - \psi_H \left( \frac{z-d}{L} \right) + \psi_H \left( \frac{z_0}{L} \right) \right] \quad (A1)$$

15 where  $r_a$  is evaluated at height  $z$ ,  $u_*$  is the friction velocity,  $z_0$  (m) is the roughness length for  
16 momentum,  $d$  (m) is the displacement height,  $k = 0.4$  is the von Karman constant,  $\psi_H(\zeta)$  is the  
17 stability function for sensible heat discussed below, and  $L$  is the Obukhov length (m). The  
18 roughness and displacement heights are  $z_0 = 0.1z_c$  and  $d = 0.7z_c$ , respectively, where  $z_c$  is the  
19 canopy height specific to each site (<http://fluxnet.fluxdata.org/sites/site-summary/>, accessed 24  
20 February 2017). Since canopy heights are not specified for croplands or grasslands in this  
21 database, we use a constant canopy height of 1 m for grasslands and typical crop-specific heights  
22 for each agricultural site (Weaver and Bruner, 1927). The stability function is (Foken, 2017, pp.  
23 54-62; Högström, 1988)

$$24 \quad \psi_H(\zeta) = \begin{cases} 2 \ln \left( \frac{1 + 0.95(1 - 11.6\zeta)^{1/2}}{2} \right) & \text{for } \zeta < 0 \\ 1 - \left( 1 + \frac{2}{3}\zeta \right)^{\frac{3}{2}} - b_1 \left( \zeta - \frac{b_2}{b_3} \right) \exp(-b_3\zeta) - \frac{b_1 b_2}{b_3} & \text{for } \zeta \geq 0 \end{cases} \quad (A2)$$

25 where  $b_1 = 0.667$ ,  $b_2 = 5$ , and  $b_3 = 0.35$ . The form above is appropriate for strongly stable  
26 conditions ( $(z-d)/L = \zeta > 1$ ), which occur frequently in the FLUXNET2015 data, as well  
27 weak stability (Beljaars and Holtslag, 1991).

28  
29 The Obukhov length is (Foken, 2017, pp. 54-62)

$$30 \quad L = - \frac{u_*^3 \theta_v}{kg(\overline{w'\theta'_v})} \quad (A3)$$

31 where  $\theta_v$  is virtual potential temperature,  $\overline{w'\theta'_v}$  is the vertical flux of virtual potential temperature  
32 or buoyancy at the surface, and  $g$  is acceleration due to gravity. For calculations, we expand  $\theta_v$   
33 and  $\overline{w'\theta'_v}$  in terms of measured quantities so

34 
$$L = - \frac{u_*^3 c_p \rho \theta (1 + 0.61q)}{kg(H(1 + 0.61q) + 0.61c_p \theta E)} \quad (\text{A4})$$

35 where  $c_p$  is specific heat capacity of air ( $\text{J kg}^{-1} \text{K}^{-1}$ ),  $\rho$  is the mass density of air ( $\text{kg m}^{-3}$ ),  $\theta$  is  
 36 potential temperature (K),  $q$  is specific humidity ( $\text{kg kg}^{-1}$ ),  $H$  is the surface sensible heat flux ( $\text{W}$   
 37  $\text{m}^{-2}$ ), and  $E$  is the surface moisture flux ( $\text{kg m}^{-2} \text{s}^{-1}$ ).  $H$  and  $E$  are defined positive for upward  
 38 fluxes.

39  
 40 The quasi-laminar layer resistance for  $\text{O}_3$  and  $\text{H}_2\text{O}$  is (Foken, 2017, pp. 219-223)

41 
$$r_b = \frac{2}{ku_*} \left( \frac{\text{Sc}}{\text{Pr}} \right)^{2/3}, \quad (\text{A5})$$

42 where  $\text{Sc} = \nu/D$  is the Schmidt number, which is the ratio of kinematic viscosity of air ( $\nu$ ) to the  
 43 molecular diffusivity of the gas in air ( $D$ ), and  $\text{Pr} = \nu/D_H$  is the Prandtl number, which involves  
 44 the thermal diffusivity ( $D_H$ ). The conductance for heat is the same as Eq. A5, but uses the  
 45 thermal diffusivity of air in place of molecular diffusivity.

46  
 47 We calculate stomatal resistance and conductance from the evaporative-resistance form of the  
 48 Penman-Monteith equation (Monteith, 1981; Gerosa et al., 2007). For water vapor,

49 
$$g_{s,w}^{-1} = r_{s,w} = \frac{\varepsilon \rho (e_s(T_f) - e)}{pE} - (r_a + r_{b,w}) \quad (\text{A6})$$

50 where  $\varepsilon = 0.622$  is the mass ratio of  $\text{H}_2\text{O}$  and dry air,  $p$  is the air pressure,  $e_s(T_f)$  is the saturation  
 51 vapor pressure at the transpiring leaf surface with temperature  $T_f$ ,  $e$  is vapor pressure at the flux  
 52 measurement height, and  $r_{b,w}$  is the quasi-laminar layer resistance to water vapor (Eq. A5). Leaf  
 53 temperature is not a standard FLUXNET2015 variable, but it can be estimated from sensible heat  
 54 flux using surface energy balance (Gerosa et al., 2007):

55 
$$T_f = T + \frac{H}{c_p \rho} (r_a + r_{b,H}) \quad (\text{A7})$$

56 where  $T$  is the air temperature at the measurement height and  $r_{b,H}$  is the quasi-laminar layer  
 57 resistance to heat (Eq. A5). We initially inverted Monteith's (1981) original equation for  
 58 evapotranspiration (Eq. 4 in Gerosa et al., 2007) in place of Eq. A6, but the resulting  $g_{s,w}$   
 59 estimates were much more noisy. Although the forms are analytically equivalent (Gerosa et al.,  
 60 2007), inverting the evaporative-resistance form is numerically preferable because it avoids  
 61 subtractive terms that amplify relative errors and it more accurately treats temperature and  
 62 pressure effects, particularly the non-linearity in the saturation vapor pressure.

63  
 64 The stomatal conductance of  $\text{O}_3$  is less than water vapor due to its greater molar mass and  
 65 diffusion against the net gas flow out of the stomatal pore (Marrero and Mason, 1972), so

66 
$$g_s = 0.6 g_{s,w}. \quad (\text{A8})$$

67 In all equations, we include the temperature and pressure dependences of  $\rho$ ,  $c_p$ ,  $v$ ,  $D$ ,  $D_H$ , and  
 68 latent heat of vaporization and also the humidity dependence of  $\rho$ ,  $c_p$ , and  $D_H$  using expressions  
 69 from Jacobson (2005).

70  
 71

## 72 **S2 Propagation of uncertainty**

73

74 We estimate uncertainties in all derived quantities using standard techniques for propagation of  
 75 errors (e.g. Taylor, 1997, pp. 73-77). In the following section,  $f$  is a function that depends on  
 76 variables  $x_1, x_2, \dots, x_n$  that each have uncertainties  $\sigma_{x_1}, \sigma_{x_2}, \dots, \sigma_{x_n}$ . The standard error ( $\sigma_f$ ) in  
 77  $f(x_1, x_2, \dots, x_n)$  at time  $i$  is approximately

$$78 \quad \sigma_{f,i}^2 = \sum_{j=1}^n \left( \frac{\partial f_i}{\partial x_j} \right)^2 \sigma_{x_j,i}^2. \quad (\text{B1})$$

79 This form neglects covariance between the measurement errors, which is unknown in our case,  
 80 and is most accurate when  $\sigma_{x_j} \ll x_j$ . We use centered finite differences to calculate numerical  
 81 derivatives through all equations.

82

83 The propagation of errors reveals that  $F_{s,O_3}^{\text{syn}}$  and other quantities have errors or uncertainties that  
 84 vary widely from hour to hour. Daily and monthly averages should account for the varying  
 85 confidence in each value in the average (e.g. Taylor, 1997, pp. 173-177). For values  $f_i$  that are  
 86 from a single distribution, but have different uncertainties  $\sigma_{f,i}$ , the maximum likelihood estimate  
 87 of  $f$  is

$$88 \quad \bar{f} = \left( \sum_{i=1}^m w_i f_i \right) \left( \sum_{i=1}^m w_i \right)^{-1}; \quad w_i = \sigma_{f,i}^{-2}. \quad (\text{B2})$$

89 The weights  $w_i$  reflect the confidence in value  $f_i$  and the summation is carried out over all times  
 90  $m$  within the desired averaging period. The standard error of  $\bar{f}$  is

$$91 \quad \sigma_{\bar{f}} = \left( \sum_{i=1}^m w_i \right)^{-\frac{1}{2}}. \quad (\text{B3})$$

92 For averaging across times when  $f$  is expected to change, as during different hours of the day, an  
 93 unweighted average is more appropriate

$$94 \quad \bar{f} = \frac{1}{m} \sum_{i=1}^m f_i \quad (\text{B4})$$

95 and the standard error of  $\bar{f}$ , given by Eq. B1, simplifies to

$$96 \quad \sigma_{\bar{f}} = \left( \frac{1}{m^2} \sum_{i=1}^m \sigma_{f,i}^2 \right)^{\frac{1}{2}}. \quad (\text{B5})$$

### 97 **S3 Stomatal and non-stomatal O<sub>3</sub> deposition at Harvard Forest**

98  
99 Our estimate of the non-stomatal fraction of O<sub>3</sub> deposition at Harvard Forest (mean 8%, range –  
100 33 to 34%; Sect. 3.2) is smaller than was previously reported at that site (mean 40%, range 20-  
101 60%; Clifton et al., 2017). The main reason for the different results is the re-calibration of the  
102 water vapor fluxes in this work, which is described in Sect. 2.2. Here, we show how other  
103 differences between our analysis and that of Clifton et al. (2017) affect the estimate of non-  
104 stomatal fraction of O<sub>3</sub> deposition at Harvard Forest. Using our gap-filled data, the mean  
105 estimate of the non-stomatal fraction of O<sub>3</sub> deposition at Harvard Forest does not change but the  
106 range slightly increases (8%, range –36 to 38%). With uncorrected water vapor fluxes, our  
107 estimate would be 51% (range: 32% to 63%). If we also ignore the propagated uncertainty,  
108 which varies from hour to hour, and calculate averages with equal weight (i.e. equal uncertainty)  
109 for each time interval, as Clifton et al. did, then we would estimate 53% (range: 34% to 66%). If  
110 we also use data filtering criteria from Clifton et al. (i.e. remove 3 $\sigma$  outliers of  $v_d$  and  $g_s$ , but no  
111 filtering for precipitation and high relative humidity), then we would estimate 48% (range: 28%  
112 to 61%). Finally, if we also restrict our averages to 9am-3pm, as Clifton et al. did, instead of all  
113 daylight data, then we would estimate 45% (range: 25% to 60%). This final estimate is very  
114 close to the method and value reported by Clifton et al. (2017). The remaining small differences  
115 are probably due to Clifton et al. including 1992 in their analysis and differences in the form of  
116 the Penman-Monteith and stability functions. Since the re-calibration of water vapor fluxes (Sect.  
117 2.2) is an improvement in this work and the main reason for our results differing from Clifton et  
118 al. (2017), our estimates of small non-stomatal fraction O<sub>3</sub> deposition at Harvard Forest appear to  
119 be most reliable estimate for this site.  
120

Table S1. Description of FLUXNET2015 Tier 1 sites used in SynFlux.

| Site name           | PFT <sup>1</sup> | Lat <sup>2</sup> | Lon <sup>3</sup> | Clim <sup>4</sup> | Period    | References <sup>5</sup>        |
|---------------------|------------------|------------------|------------------|-------------------|-----------|--------------------------------|
| AT-Neu              | GRA              | 47.1167          | 11.3175          | Unk               | 2002-2012 | (Wohlfahrt et al., 2008)       |
| BE-Bra              | MF               | 51.3092          | 4.5206           | Unk               | 1996-2014 | (Carrara et al., 2004)         |
| BE-Lon              | CRO              | 50.5516          | 4.7461           | Cfb               | 2004-2014 | (Moureaux et al., 2006)        |
| BE-Vie              | MF               | 50.3051          | 5.9981           | Cfb               | 1996-2014 | (Aubinet et al., 2001)         |
| CH-Cha              | GRA              | 47.2102          | 8.4104           | Unk               | 2005-2014 | (Merbold et al., 2014)         |
| CH-Dav              | ENF              | 46.8153          | 9.8559           | Unk               | 1997-2014 | (Zielis et al., 2014)          |
| CH-Fru              | GRA              | 47.1158          | 8.5378           | Unk               | 2005-2014 | (Imer et al., 2013)            |
| CH-Lae              | MF               | 47.4781          | 8.3650           | Unk               | 2004-2014 | (Etzold et al., 2011)          |
| CH-Oe1              | GRA              | 47.2858          | 7.7319           | Unk               | 2002-2008 | (Ammann et al., 2009)          |
| CH-Oe2              | CRO              | 47.2863          | 7.7343           | Unk               | 2004-2014 | (Dietiker et al., 2010)        |
| CZ-BK1              | ENF              | 49.5021          | 18.5369          | Unk               | 2004-2008 | (Acosta et al., 2013)          |
| CZ-BK2              | GRA              | 49.4944          | 18.5429          | Unk               | 2004-2006 | –                              |
| CZ-wet              | WET              | 49.0247          | 14.7704          | Unk               | 2006-2014 | (Důšek et al., 2012)           |
| DE-Akm              | WET              | 53.8662          | 13.6834          | Cfb               | 2009-2014 | –                              |
| DE-Geb              | CRO              | 51.1001          | 10.9143          | Unk               | 2001-2014 | (Anthoni et al., 2004)         |
| DE-Gri              | GRA              | 50.9500          | 13.5126          | Cfb               | 2004-2014 | (Prescher et al., 2010a)       |
| DE-Hai              | DBF              | 51.0792          | 10.4530          | Unk               | 2000-2012 | (Knohl et al., 2003)           |
| DE-Kli              | CRO              | 50.8931          | 13.5224          | Cfb               | 2004-2014 | (Prescher et al., 2010)        |
| DE-Lkb              | ENF              | 49.0996          | 13.3047          | Unk               | 2009-2013 | (Lindauer et al., 2014)        |
| DE-Obe              | ENF              | 50.7867          | 13.7213          | Cfb               | 2008-2014 | –                              |
| DE-RuR <sup>6</sup> | GRA              | 50.6219          | 6.3041           | Unk               | 2011-2014 | (Post et al., 2015)            |
| DE-RuS <sup>6</sup> | CRO              | 50.8659          | 6.4472           | Cfb               | 2011-2014 | (Mauder et al., 2013)          |
| DE-Seh              | CRO              | 50.8706          | 6.4497           | Unk               | 2007-2010 | (Schmidt et al., 2012)         |
| DE-SfN              | WET              | 47.8064          | 11.3275          | Unk               | 2012-2014 | (Hommeltenberg et al., 2014)   |
| DE-Spw              | WET              | 51.8923          | 14.0337          | Cfb               | 2010-2014 | –                              |
| DE-Tha              | ENF              | 50.9624          | 13.5652          | Cfb               | 1996-2014 | (Grünwald and Bernhofer, 2007) |
| DK-Fou              | CRO              | 56.4842          | 9.5872           | Unk               | 2005-2005 | –                              |
| DK-Sor              | DBF              | 55.4859          | 11.6446          | Unk               | 1996-2014 | (Pilegaard et al., 2011)       |
| ES-LgS              | OSH              | 37.0979          | -2.9658          | Unk               | 2007-2009 | (Reverter et al., 2010)        |
| ES-Ln2              | OSH              | 36.9695          | -3.4758          | Unk               | 2009-2009 | –                              |
| FI-Hyy              | ENF              | 61.8474          | 24.2948          | Unk               | 1996-2014 | (Mammarella et al., 2007)      |
| FI-Jok              | CRO              | 60.8986          | 23.5135          | Unk               | 2000-2003 | (Lohila, 2004)                 |
| FI-Lom              | WET              | 67.9972          | 24.2092          | Unk               | 2007-2009 | –                              |
| FI-Sod              | ENF              | 67.3619          | 26.6378          | Unk               | 2001-2014 | (Thum et al., 2007)            |
| FR-Fon              | DBF              | 48.4764          | 2.7801           | Cfb               | 2005-2014 | (Delpierre et al., 2015)       |
| FR-Gri              | CRO              | 48.8442          | 1.9519           | Cfb               | 2004-2013 | (Loubet et al., 2011)          |
| FR-LBr              | ENF              | 44.7171          | -0.7693          | Unk               | 1996-2008 | (Berbigier et al., 2001)       |
| FR-Pue              | EBF              | 43.7414          | 3.5958           | Unk               | 2000-2014 | (Rambal et al., 2004)          |
| IT-BCi              | CRO              | 40.5238          | 14.9574          | Unk               | 2004-2014 | (Vitale et al., 2015)          |
| IT-CA1              | DBF              | 42.3804          | 12.0266          | Unk               | 2011-2014 | (Sabbatini et al., 2016)       |
| IT-CA2              | CRO              | 42.3772          | 12.0260          | Unk               | 2011-2014 | (Sabbatini et al., 2016)       |
| IT-CA3              | DBF              | 42.3800          | 12.0222          | Unk               | 2011-2014 | (Sabbatini et al., 2016)       |
| IT-Col              | DBF              | 41.8494          | 13.5881          | Unk               | 1996-2014 | (Valentini et al., 1996)       |

|        |     |         |           |     |           |                            |
|--------|-----|---------|-----------|-----|-----------|----------------------------|
| IT-Cp2 | EBF | 41.7043 | 12.3573   | Unk | 2012-2014 | (Fares et al., 2014)       |
| IT-Cpz | EBF | 41.7052 | 12.3761   | Unk | 1997-2009 | (Garbulsky et al., 2008)   |
| IT-Isp | DBF | 45.8126 | 8.6336    | Unk | 2013-2014 | (Ferréa et al., 2012)      |
| IT-La2 | ENF | 45.9542 | 11.2853   | Unk | 2000-2002 | (Marcolla et al., 2003)    |
| IT-Lav | ENF | 45.9562 | 11.2813   | Unk | 2003-2014 | (Marcolla et al., 2003)    |
| IT-MBo | GRA | 46.0147 | 11.0458   | Unk | 2003-2013 | (Marcolla et al., 2011)    |
| IT-Noe | CSH | 40.6061 | 8.1515    | Unk | 2004-2014 | (Papale et al., 2014)      |
| IT-PT1 | DBF | 45.2009 | 9.0610    | Unk | 2002-2004 | (Migliavacca et al., 2009) |
| IT-Ren | ENF | 46.5869 | 11.4337   | Unk | 1998-2013 | (Montagnani et al., 2009)  |
| IT-Ro1 | DBF | 42.4081 | 11.9300   | Unk | 2000-2008 | (Rey et al., 2002)         |
| IT-Ro2 | DBF | 42.3903 | 11.9209   | Unk | 2002-2012 | (Tedeschi et al., 2006)    |
| IT-SR2 | ENF | 43.7320 | 10.2910   | Unk | 2013-2014 | –                          |
| IT-SRo | ENF | 43.7279 | 10.2844   | Unk | 1999-2012 | (Chiesi et al., 2005)      |
| IT-Tor | GRA | 45.8444 | 7.5781    | Unk | 2008-2014 | (Galvagno et al., 2013)    |
| NL-Hor | GRA | 52.2404 | 5.0713    | Unk | 2004-2011 | (Jacobs et al., 2007)      |
| NL-Loo | ENF | 52.1666 | 5.7436    | Unk | 1996-2013 | (Dolman et al., 2002)      |
| RU-Fyo | ENF | 56.4615 | 32.9221   | Unk | 1998-2014 | (Kurbatova et al., 2008)   |
| US-AR1 | GRA | 36.4267 | -99.4200  | Dsa | 2009-2012 | (Raz-Yaseef et al., 2015)  |
| US-AR2 | GRA | 36.6358 | -99.5975  | Dsa | 2009-2012 | (Raz-Yaseef et al., 2015)  |
| US-ARb | GRA | 35.5497 | -98.0402  | Cfa | 2005-2006 | (Raz-Yaseef et al., 2015)  |
| US-ARc | GRA | 35.5465 | -98.0400  | Cfa | 2005-2006 | (Raz-Yaseef et al., 2015)  |
| US-ARM | CRO | 36.6058 | -97.4888  | Cfa | 2003-2012 | (Fischer et al., 2007)     |
| US-Blo | ENF | 38.8953 | -120.6328 | Csa | 1997-2007 | (Goldstein et al., 2000)   |
| US-Cop | GRA | 38.0900 | -109.3900 | Unk | 2001-2007 | (Bowling et al., 2010)     |
| US-GBT | ENF | 41.3658 | -106.2397 | Dfc | 1999-2006 | (Zeller and Nikolov, 2000) |
| US-GLE | ENF | 41.3665 | -106.2399 | Dfc | 2004-2014 | (Frank et al., 2014)       |
| US-Ha1 | DBF | 42.5378 | -72.1715  | Dfb | 1991-2012 | (Urbanski et al., 2007)    |
| US-KS2 | CSH | 28.6086 | -80.6715  | Cwa | 2003-2006 | (Powell et al., 2006)      |
| US-Los | WET | 46.0827 | -89.9792  | Dfb | 2000-2014 | (Sulman et al., 2009)      |
| US-Me1 | ENF | 44.5794 | -121.5000 | Csb | 2004-2005 | (Irvine et al., 2007)      |
| US-Me2 | ENF | 44.4523 | -121.5574 | Csb | 2002-2014 | (Irvine et al., 2008)      |
| US-Me6 | ENF | 44.3233 | -121.6078 | Csb | 2010-2014 | (Ruehr et al., 2012)       |
| US-MMS | DBF | 39.3232 | -86.4131  | Cfa | 1999-2014 | (Dragoni et al., 2011)     |
| US-Myb | WET | 38.0498 | -121.7651 | Csa | 2010-2014 | (Matthes et al., 2014)     |
| US-Ne1 | CRO | 41.1651 | -96.4766  | Dfa | 2001-2013 | (Verma et al., 2005)       |
| US-Ne2 | CRO | 41.1649 | -96.4701  | Dfa | 2001-2013 | (Verma et al., 2005)       |
| US-Ne3 | CRO | 41.1797 | -96.4397  | Dfa | 2001-2013 | (Verma et al., 2005)       |
| US-NR1 | ENF | 40.0329 | -105.5464 | Dfc | 1998-2014 | (Monson et al., 2002)      |
| US-ORv | WET | 40.0201 | -83.0183  | Cfa | 2011-2011 | (Morin et al., 2014)       |
| US-PFa | MF  | 45.9459 | -90.2723  | Dfb | 1995-2014 | (Desai et al., 2015)       |
| US-SRG | GRA | 31.7894 | -110.8277 | Bsk | 2008-2014 | (Scott et al., 2015)       |
| US-SRM | WSA | 31.8214 | -110.8661 | Bsk | 2004-2014 | (Scott et al., 2009)       |
| US-Syv | MF  | 46.2420 | -89.3477  | Dfb | 2001-2014 | (Desai et al., 2005)       |
| US-Ton | WSA | 38.4316 | -120.9660 | Csa | 2001-2014 | (Baldocchi et al., 2010)   |
| US-Tw1 | WET | 38.1074 | -121.6469 | Csa | 2012-2014 | (Oikawa et al., 2017)      |
| US-Tw2 | CRO | 38.1047 | -121.6433 | Csa | 2012-2013 | (Knox et al., 2016)        |

|        |     |         |           |     |           |                          |
|--------|-----|---------|-----------|-----|-----------|--------------------------|
| US-Tw3 | CRO | 38.1159 | -121.6467 | Csa | 2013-2014 | (Baldocchi et al., 2015) |
| US-Tw4 | WET | 38.1030 | -121.6414 | Csa | 2013-2014 | (Baldocchi, 2016)        |
| US-Twt | CRO | 38.1087 | -121.6530 | Csa | 2009-2014 | (Hatala et al., 2012)    |
| US-UMB | DBF | 45.5598 | -84.7138  | Dfb | 2000-2014 | (Gough et al., 2013)     |
| US-UMd | DBF | 45.5625 | -84.6975  | Dfb | 2007-2014 | (Gough et al., 2013)     |
| US-Var | GRA | 38.4133 | -120.9507 | Csa | 2000-2014 | (Ma et al., 2007)        |
| US-WCr | DBF | 45.8059 | -90.0799  | Dfb | 1999-2014 | (Cook et al., 2004)      |
| US-Whs | OSH | 31.7438 | -110.0522 | Bsk | 2007-2014 | (Scott et al., 2015)     |
| US-Wi0 | ENF | 46.6188 | -91.0814  | Dfb | 2002-2002 | (Noormets et al., 2007)  |
| US-Wi3 | DBF | 46.6347 | -91.0987  | Dfb | 2002-2004 | (Noormets et al., 2007)  |
| US-Wi4 | ENF | 46.7393 | -91.1663  | Dfb | 2002-2005 | (Noormets et al., 2007)  |
| US-Wi6 | OSH | 46.6249 | -91.2982  | Dfb | 2002-2003 | (Noormets et al., 2007)  |
| US-Wi9 | ENF | 46.6188 | -91.0814  | Dfb | 2004-2005 | (Noormets et al., 2007)  |
| US-Wkg | GRA | 31.7365 | -109.9419 | Bsk | 2004-2014 | (Scott et al., 2010)     |

123 <sup>1</sup> Plant functional type; see Table 2 for abbreviations.

124 <sup>2</sup> Positive value indicates north latitude.

125 <sup>3</sup> Negative value indicates west longitude.

126 <sup>4</sup> Köppen Climate classification.

127 <sup>5</sup> “-” indicates that site operators have not provided a reference.

128 <sup>6</sup> Latent and sensible heat flux uncertainty not reported for this site; 50% uncertainty is  
129 assumed.

130



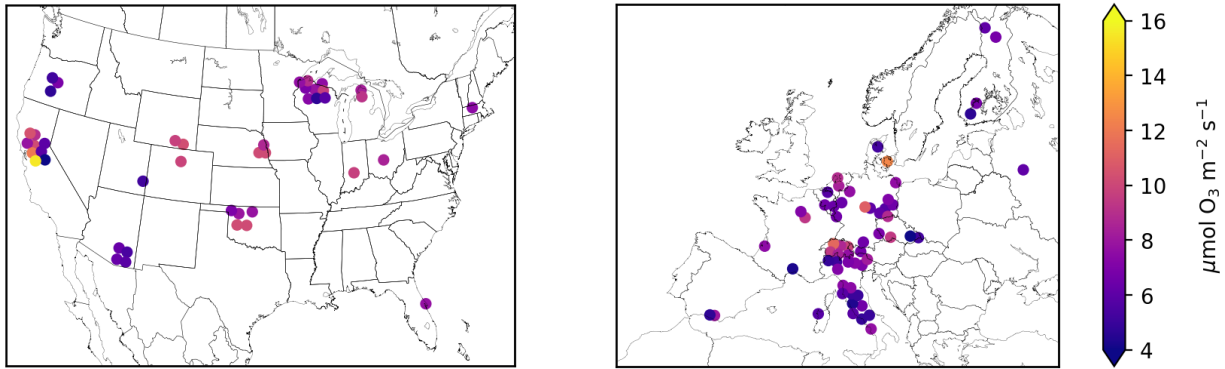

131  
 132 Figure S1. Mean synthetic total O<sub>3</sub> flux ( $F_{O_3}^{syn}$ , Sect. 2.1) during the daytime growing season at  
 133 FLUXNET2015 sites in the United States and Europe. Symbols of some sites have been moved  
 134 slightly to reduce overlap and improve legibility.  
 135  
 136

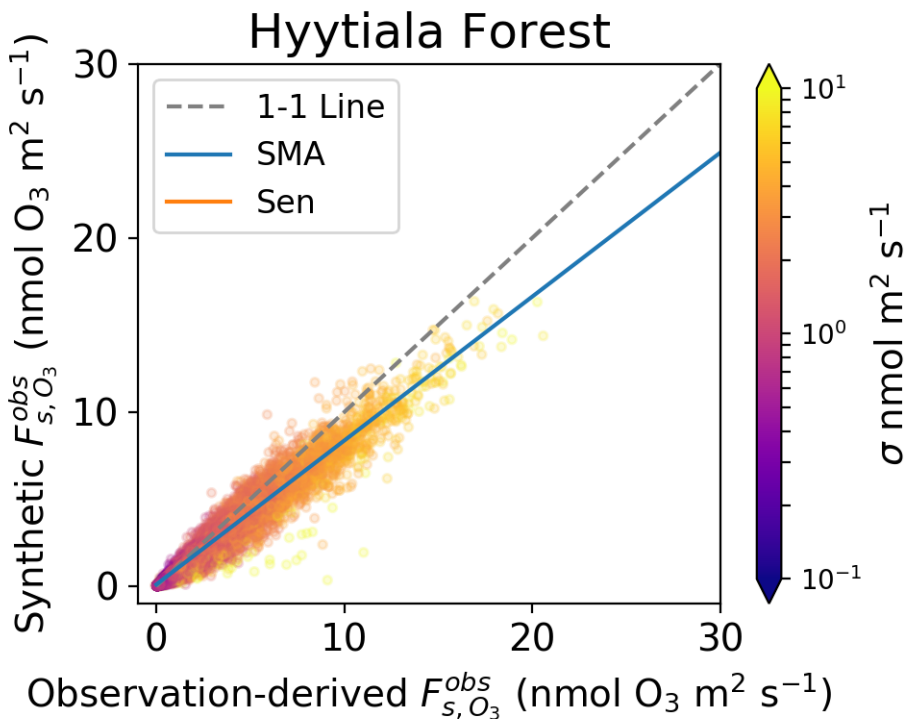

137  
 138 Figure S2. Synthetic and observed stomatal conductance,  $F_{s,O_3}^{syn}$ , at Hyytiälä Forest illustrating the  
 139 errors in half-hourly data. Colors show the standard deviation of each value on a logarithmic  
 140 scale, as calculated by error propagation.  
 141

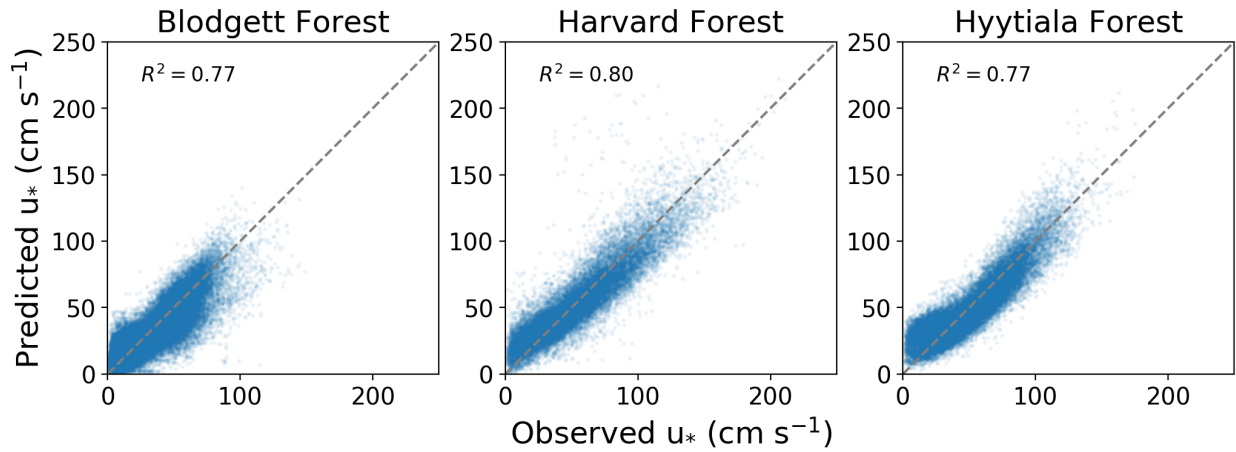

142  
143  
144  
145

Figure S3. Observed and predicted friction velocity ( $u_*$ ) from the regression model in Sect 2.3.

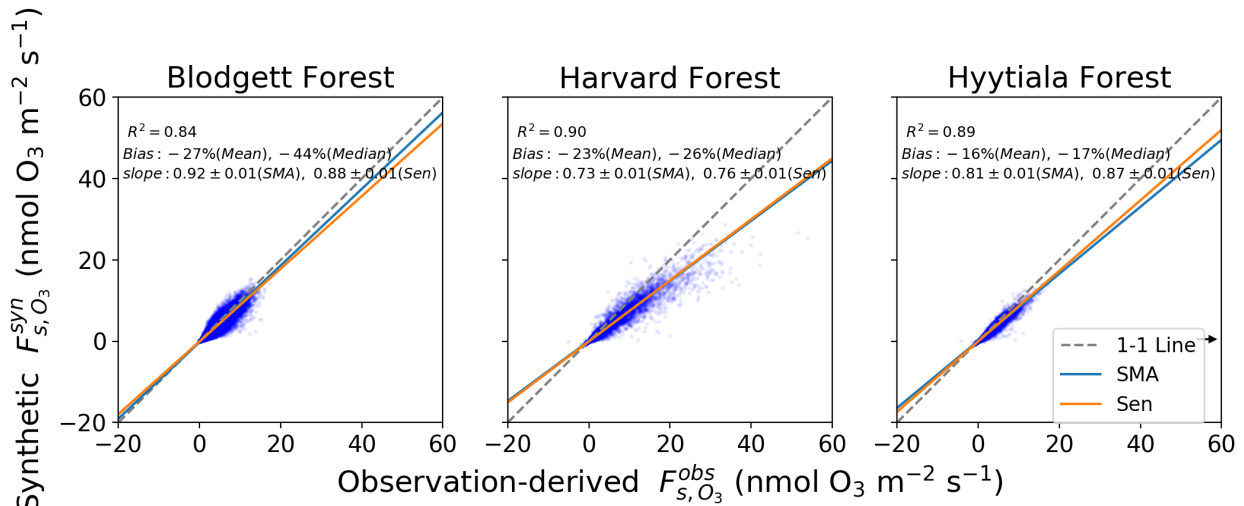

146  
147  
148  
149  
150

Figure S4. Synthetic and observation-derived half-hourly (hourly at Harvard Forest) stomatal  $\text{O}_3$  flux. See Fig. 2 for explanation of lines and inset text.

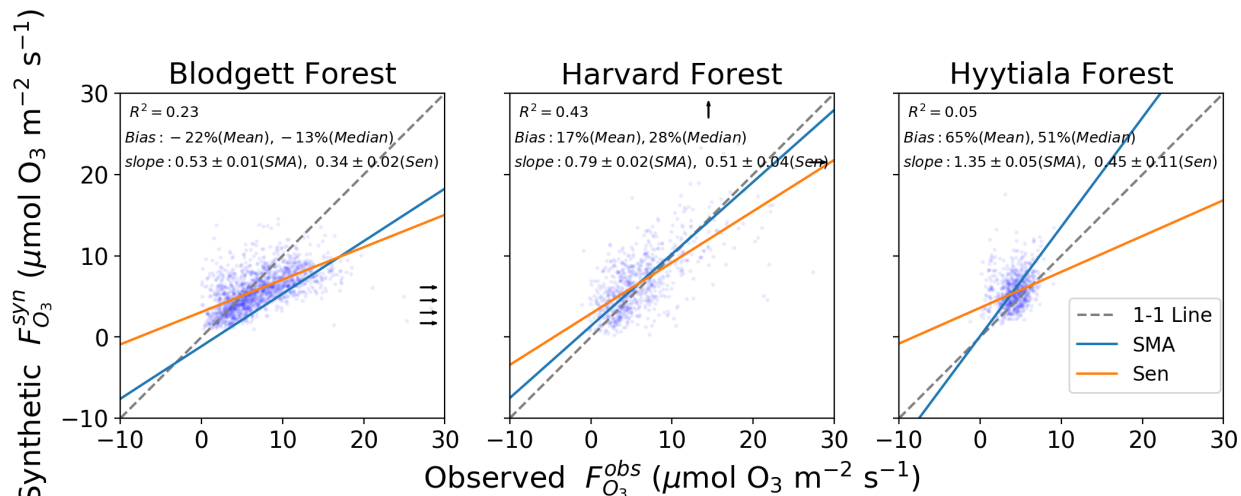

151  
 152 Figure S5. Synthetic and observation-derived daily daytime total  $O_3$  flux ( $F_{O_3}^{syn}$ , Sect. 2.1). See  
 153 Sect. 2.1 for explanation of  $F_{O_3}^{syn}$  and Fig. 2 for explanation of lines and inset text.

154  
 155

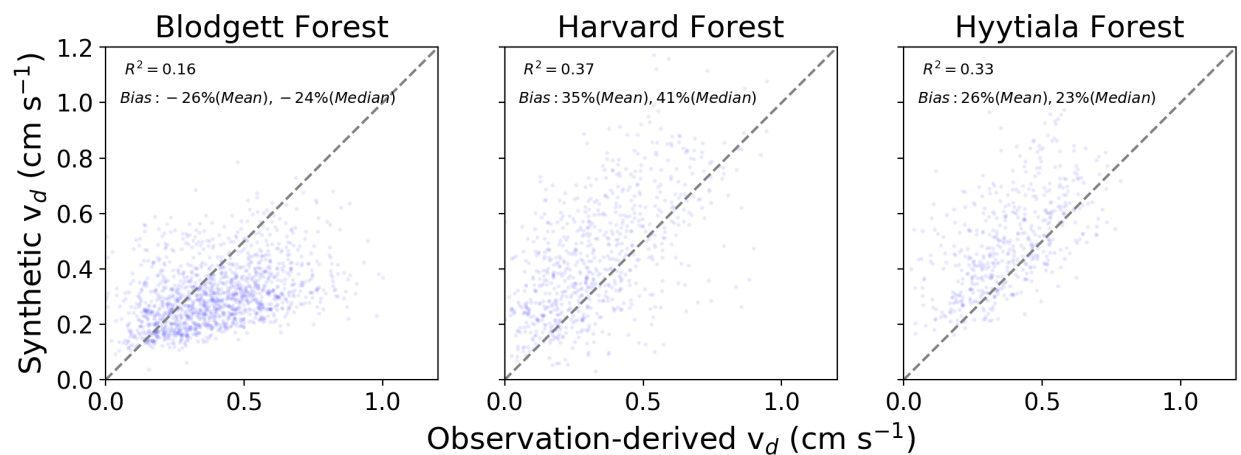

156  
 157 Figure S6. Synthetic and observation-derived daily daytime  $O_3$  deposition velocity.  
 158

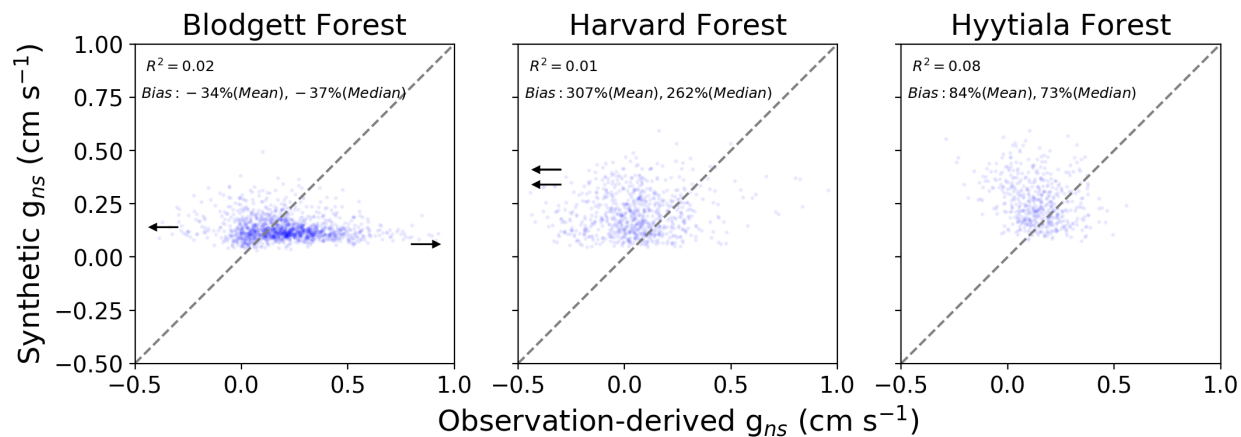

159

160 Figure S7. Synthetic and observation-derived daily daytime O<sub>3</sub> non-stomatal conductance.  
161  
162  
163

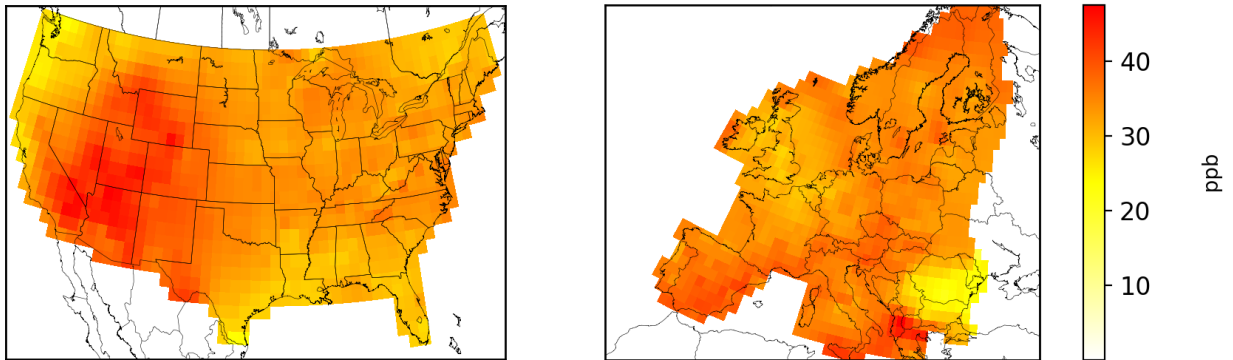

164  
165 Figure S8. Mean daytime (8:00am-8:00pm local) O<sub>3</sub> concentrations for the US and Europe  
166 during the growing season (typically April-September) for 2000-2014. Data from Schnell et al.  
167 (2014).  
168

169

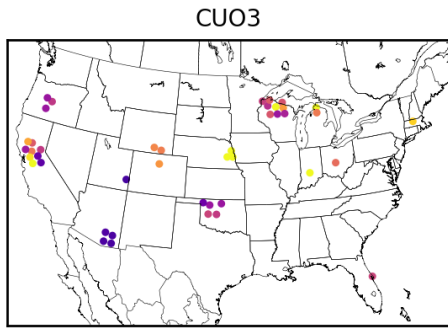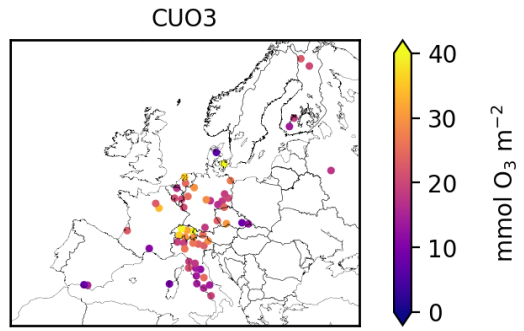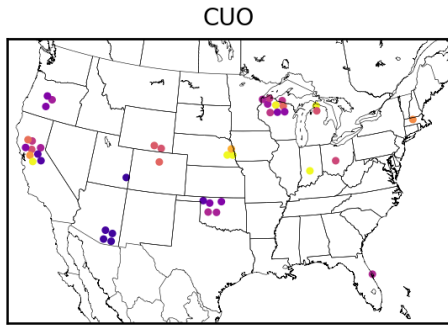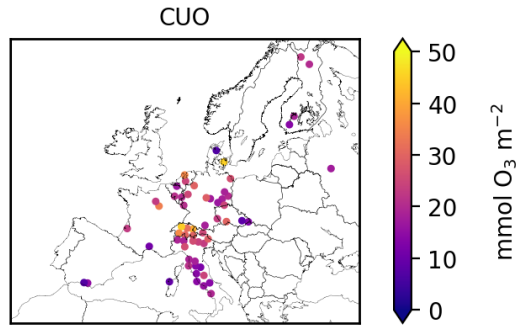

170

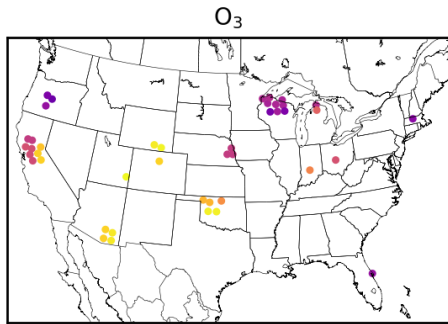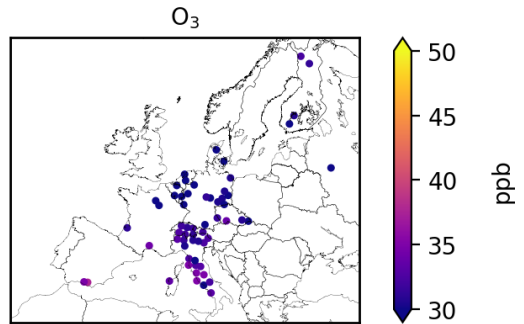

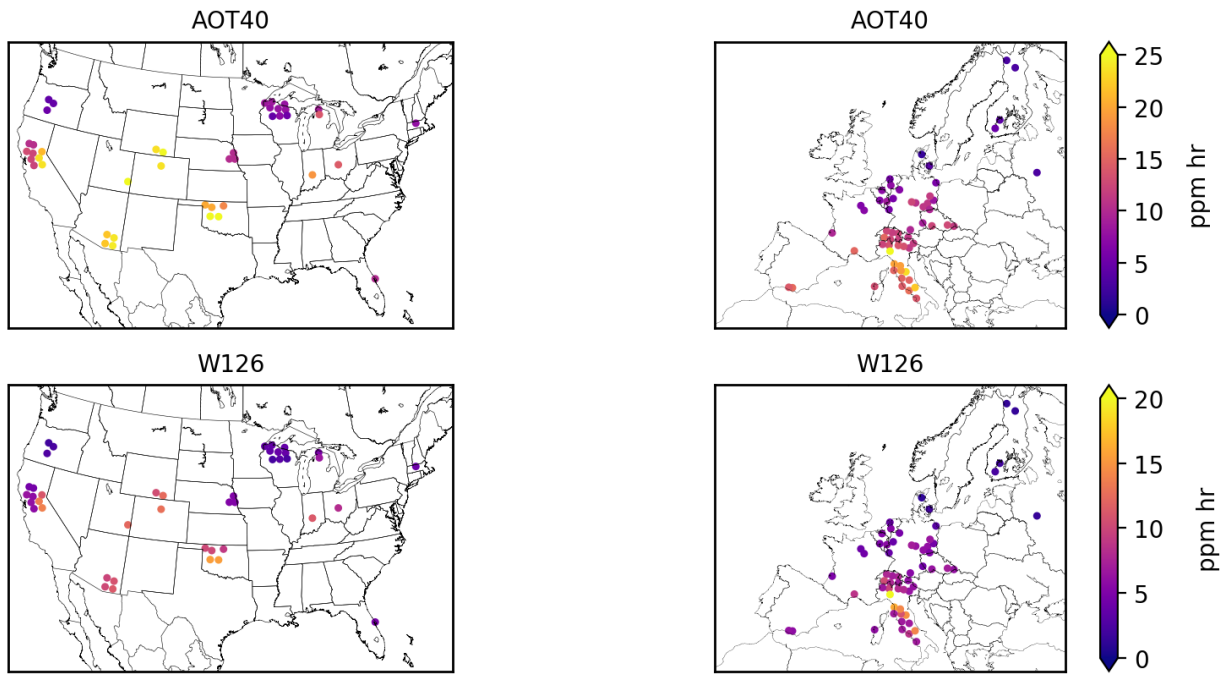

171  
 172 Figure S9. Metrics of plant exposure to O<sub>3</sub> at FLUXNET2015 sites in the US and Europe: CUO<sub>3</sub>,  
 173 CUO, mean O<sub>3</sub>, AOT40, and W126. See Sect. 3.4 for metric definitions.

174  
 175
